# Supplementary material
Source: Springer Nature journal article supplement (https://www.springermedizin.de/resource/supplementary/12992_2011_128_MOESM1_ESM.pdf/9616518)

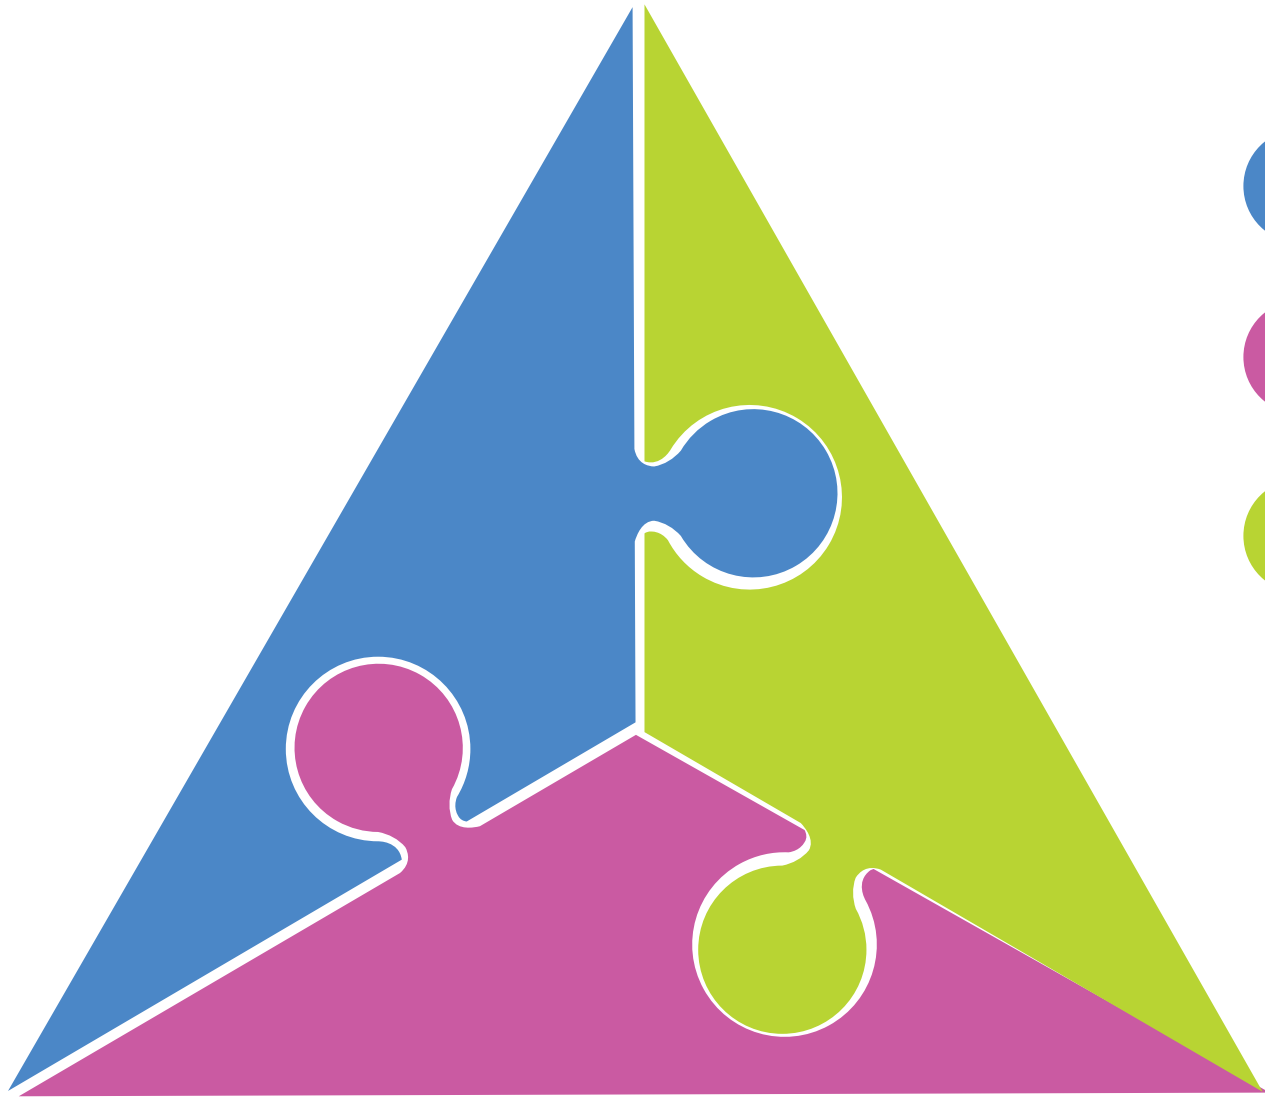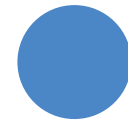

1. Knowledge and evidence generation

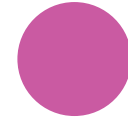

2. Mobilization of civil society and public support

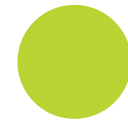

3. Leadership of politicians and policy makers

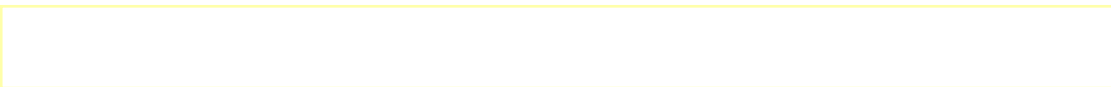

Supplement: MOESM1 [file 9616518]
